# Supplementary material
Source: publisher figshare collection journal article supplement (https://karger.figshare.com/ndownloader/files/27391193)
Supplement: Supplementary file 1 [file 27391193]

| **Gene** | **Sequences (5'-3')** |
| --- | --- |
| miR-22-3p (rat) | Forward: 5′-ACACTCCAGCTGGGAAGCTGCCAGTTGAAG-3′ |
|  | Reverse: 5′-GGTGTCGTGGAGTCGGCAA-3′ |
| U6 (rat) | Forward: 5′-CAGTTATGACGACCTAGACAG-3′ |
|  | Reverse: 5′-CAAATTTGCATGTCATCCTTGG-3′ |
| CHD9 (rat) | Forward: 5′-ATATAGAGGATGACGTTTCTTCCC-3′ |
|  | Reverse: 5′-AGGCCAGTACACTTTGTCC-3′ |
| WWC2 (rat) | Forward: 5’-AGCATTTCTGGAGATATTGGG-3′ |
|  | Reverse: 5′-GGCTTCTTCATACTGGAGAC-3′ |
| SLC16A14 (rat) | Forward: 5′-TATTTCTCCCTCATGCCCG-3′ |
|  | Reverse: 5′-AGATCCATCCTGCGAATGG-3′ |
| BCL9 (rat) | Forward: 5′-ACTGAGATGGCAAATAAGGCT-3′ |
|  | Reverse: 5′-GATGTTCTGGATGTGGAAAGAG-3′ |
| PDSS1 (rat) | Forward: 5′-GCAATGTGCAGTTGTCGTCAA-3′ |
|  | Reverse: 5′-GCCATCGAAGTAGTATTCGGAC-3′ |
| ZNF740 (rat) | Forward: 5′-GTGTTCCAGTCAGATGGAC-3′ |
|  | Reverse: 5′-TTGCGGGATTTATCACTGTC-3′ |
| FBXL19 (rat) | Forward: 5′-GAGGAGAAATTTAGTTTGAGCCTC-3′ |
|  | Reverse: 5′-CCTTTCCCATCTTCAGGCA-3′ |
| FNBP4 (rat) | Forward: 5′-CTGGAACAGAGGAGGACAC-3′ |
|  | Reverse: 5′-CAGTAGAATCAACTGAACTCTGG-3′ |
| PCNP (rat) | Forward: 5′-AGTTTGGATTTGCCATAGGT-3′ |
|  | Reverse: 5′-CCTTAGGCTTACTTGCTCC-3′ |
| WRNIP1 (rat) | Forward: 5ʹ-ATCTCAGCAGGACACTTTCC-3ʹ |
|  | Reverse: 5ʹ-GAAGGAAGGATTCTCAGTGGT-3ʹ |
| KHNYN (rat) | Forward: 5ʹ-CTCCCTGAGTCTGTTGTCC-3ʹ |
|  | Reverse: 5ʹ-ACCATGAACCTGTCATCGT-3ʹ |
| GAPDH (rat) | Forward: 5ʹ-CTTCCACCTTTGATGCTGG-3ʹ |
|  | Reverse: 5ʹ-GCCATATTCATTGTCATACCAGG-3ʹ |

**Supplementary Table 1: Relative primer sequences**
